# Supplementary material for: Enhanced ultra-broadband electromagnetic wave absorption using liquid metal-coated carbonyl Fe/Ni microspheres with dual dielectric polarization
Source: Royal Society of Chemistry journal article supplement (doi:10.1039/d4tc05067c), 2025-01-01
Supplement: d4tc05067c1.pdf [file d4tc05067c1.pdf]

## Supporting Information

### **Enhanced Ultra-Broadband Electromagnetic Wave Absorption Using Liquid Metal-Coated Carbonyl Fe/Ni Particles with Dual Dielectric Polarization**

Kang Xie, Qin Zhang\*, Feng Chen\*, and Qiang Fu

College of Polymer Science & Engineering, State Key Laboratory of Polymer Materials Engineering, Sichuan University, Chengdu, 610065, P. R. China.

\* Corresponding author. E-mail: qinzhang@scu.edu.cn (Qin. Zhang); fengchen@scu.edu.cn (Feng. Chen)

## Supplementary Fig.s and Tables

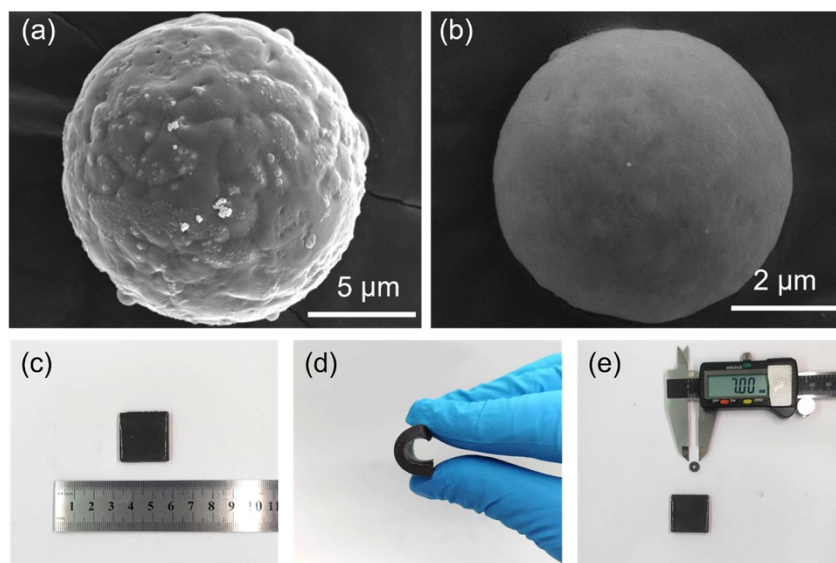

**Fig. S1** Scanning electron microscopy (SEM) image of (a) Ni, and (b) Fe. (c) Schematic of Fe/Ni @LM-PDMS. (d) Demonstration of the flexibility of Fe/Ni@LM-PDMS. (e) Sample for testing the electromagnetic parameters of Fe/Ni @LM-PDMS.

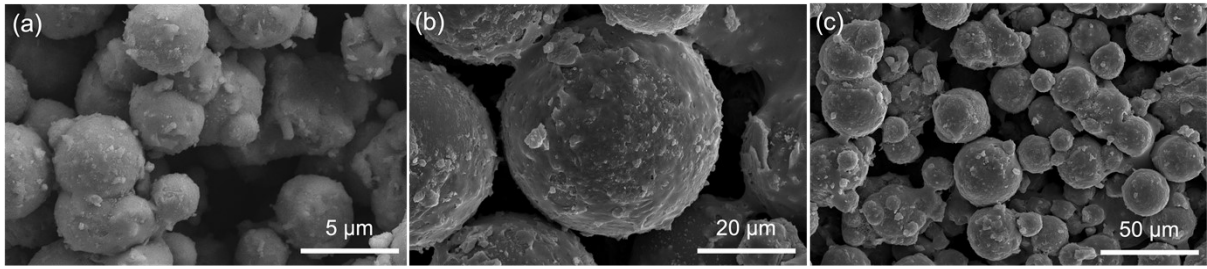

**Fig. S2** Scanning electron microscopy (SEM) image of (a) Fe@LM, and (b) Ni@LM, and (c) Fe/Ni@LM.

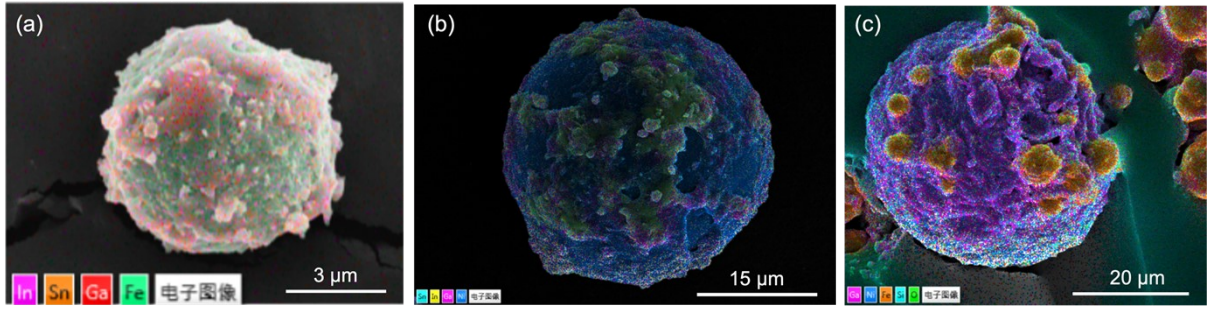

**Fig. S3** (a–c) SEM images of the microstructures and elemental distribution of Fe@LM, Ni@LM, and Fe/Ni@LM

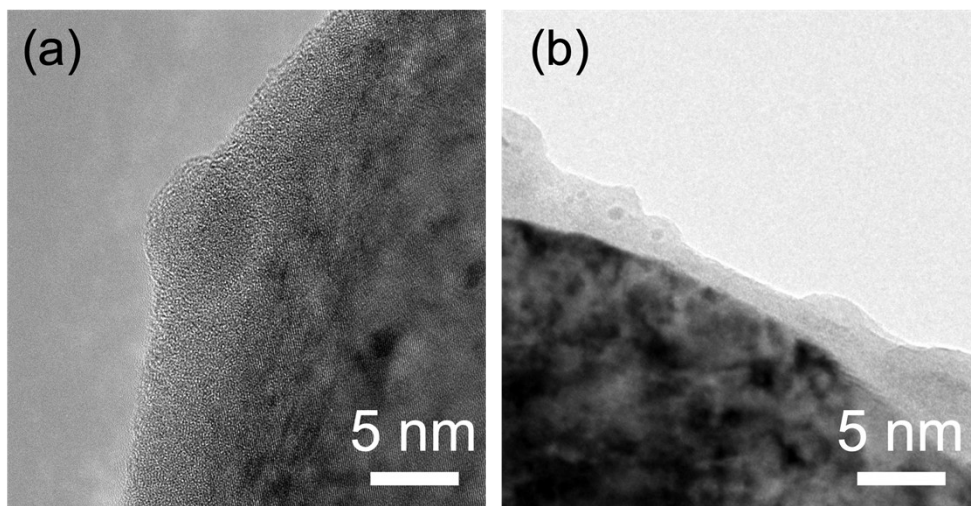

**Fig. S4** (a, b) HRTEM images of Fe/LM and Ni/LM, respectively.

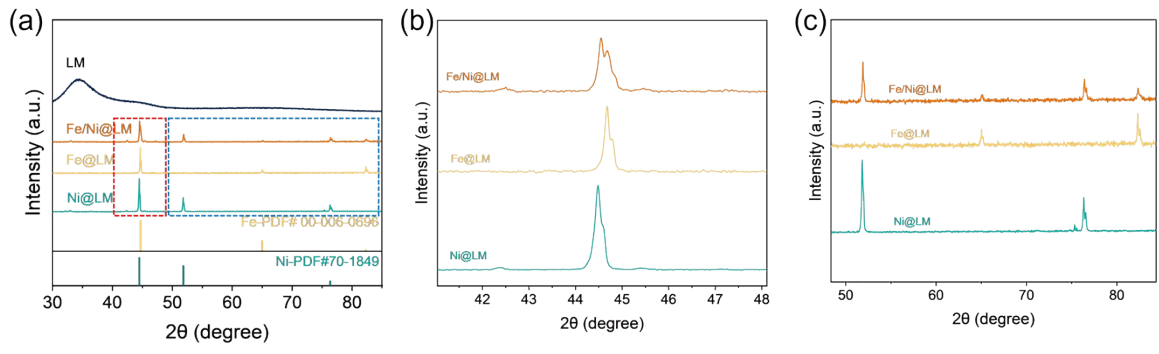

**Fig. S5** (a-c) XRD spectra of Fe@LM, Ni@LM, Fe/Ni@LM.

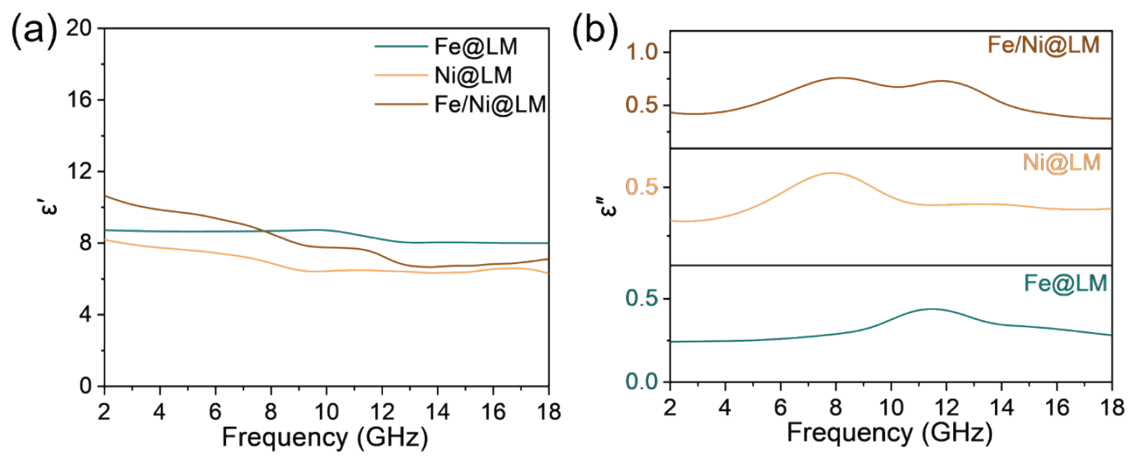

Fig. S6 The (a)  $\epsilon'$ , (b)  $\epsilon''$  for Fe@LM, Ni@LM and Fe/Ni@LM.

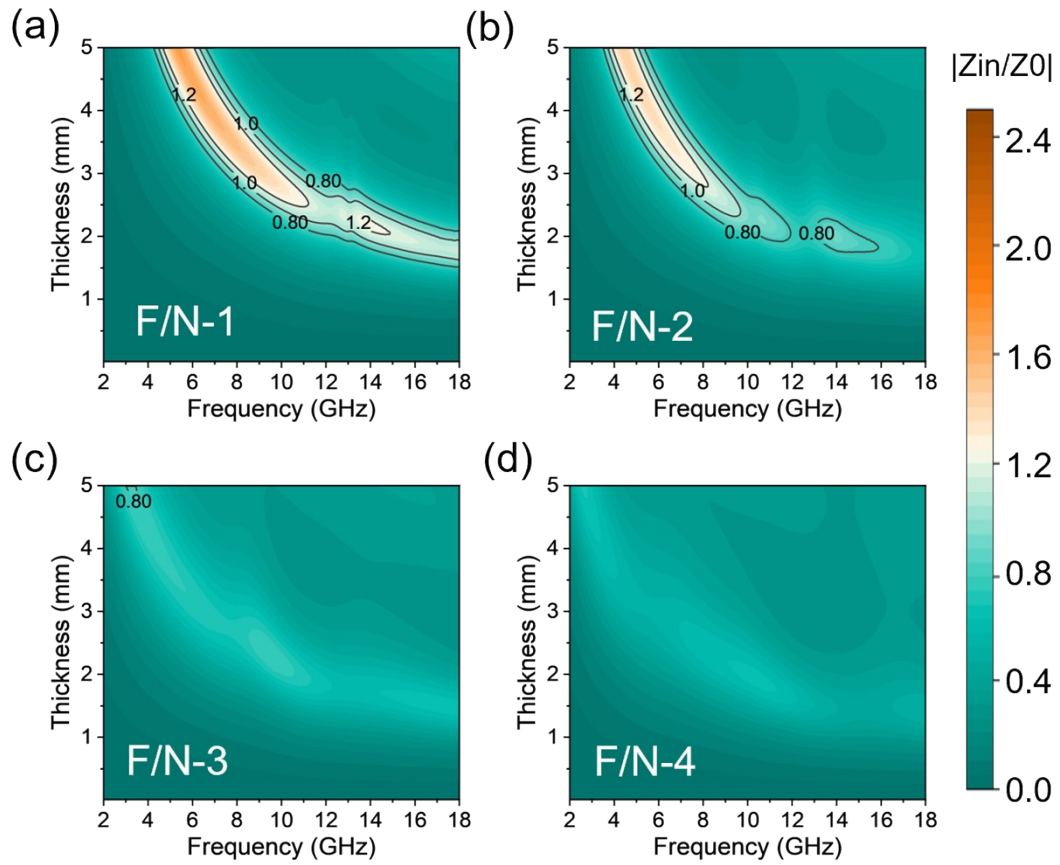

**Fig. S7** (a-d) Impedance matching degree maps  $|Z_{in}/Z_0|$ .



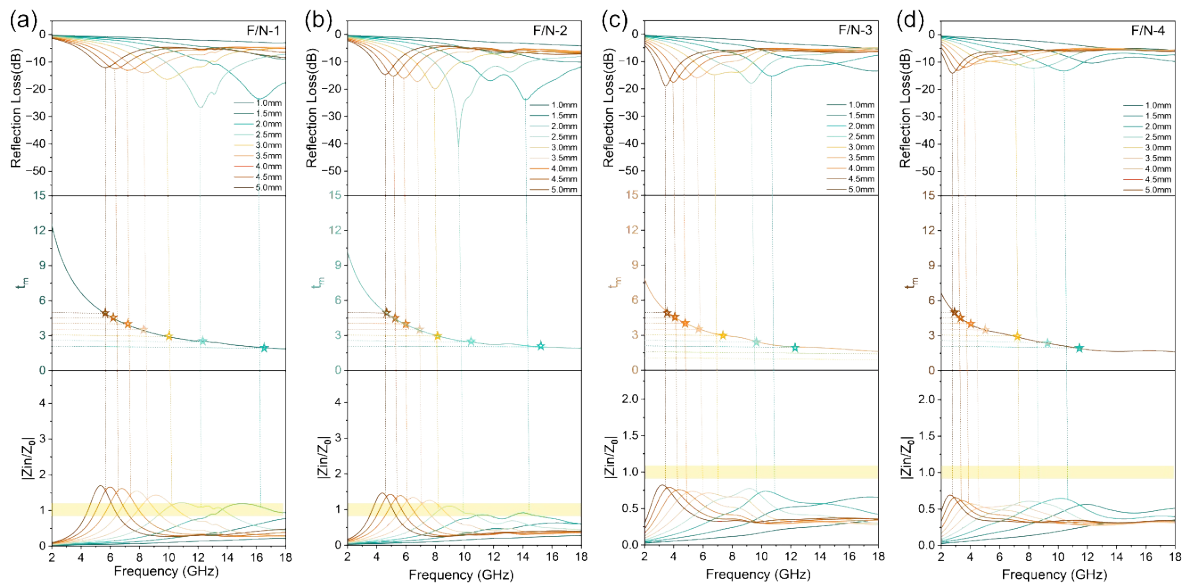

**Fig. S8** *RL* as a function of matched thickness and frequency at a quarter-wavelength ( $\lambda/4$ ) and impedance matching characteristics for (a) F/N-1, (b) F/N-2, (c) F/N-3 and (d) F/N-4.

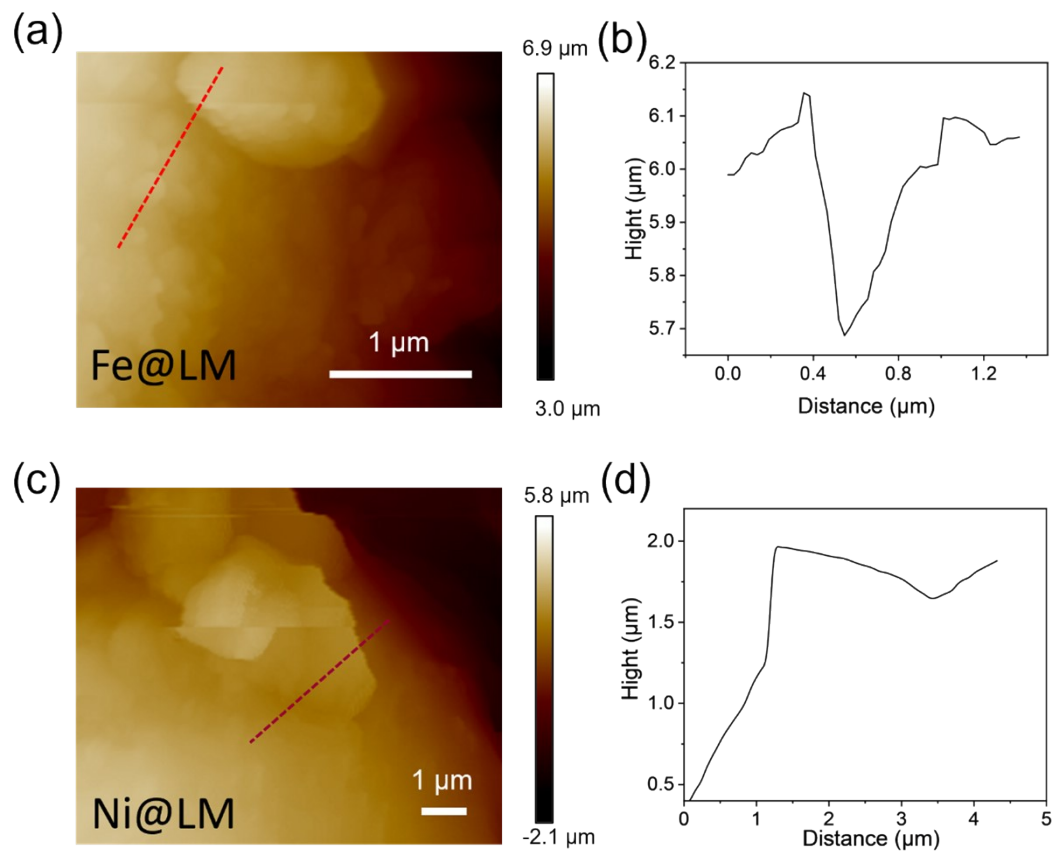

**Fig. S9** Atomic force microscopy (AFM) and height profile images of (a, b) Fe@LM and (c, d) Ni@LM.

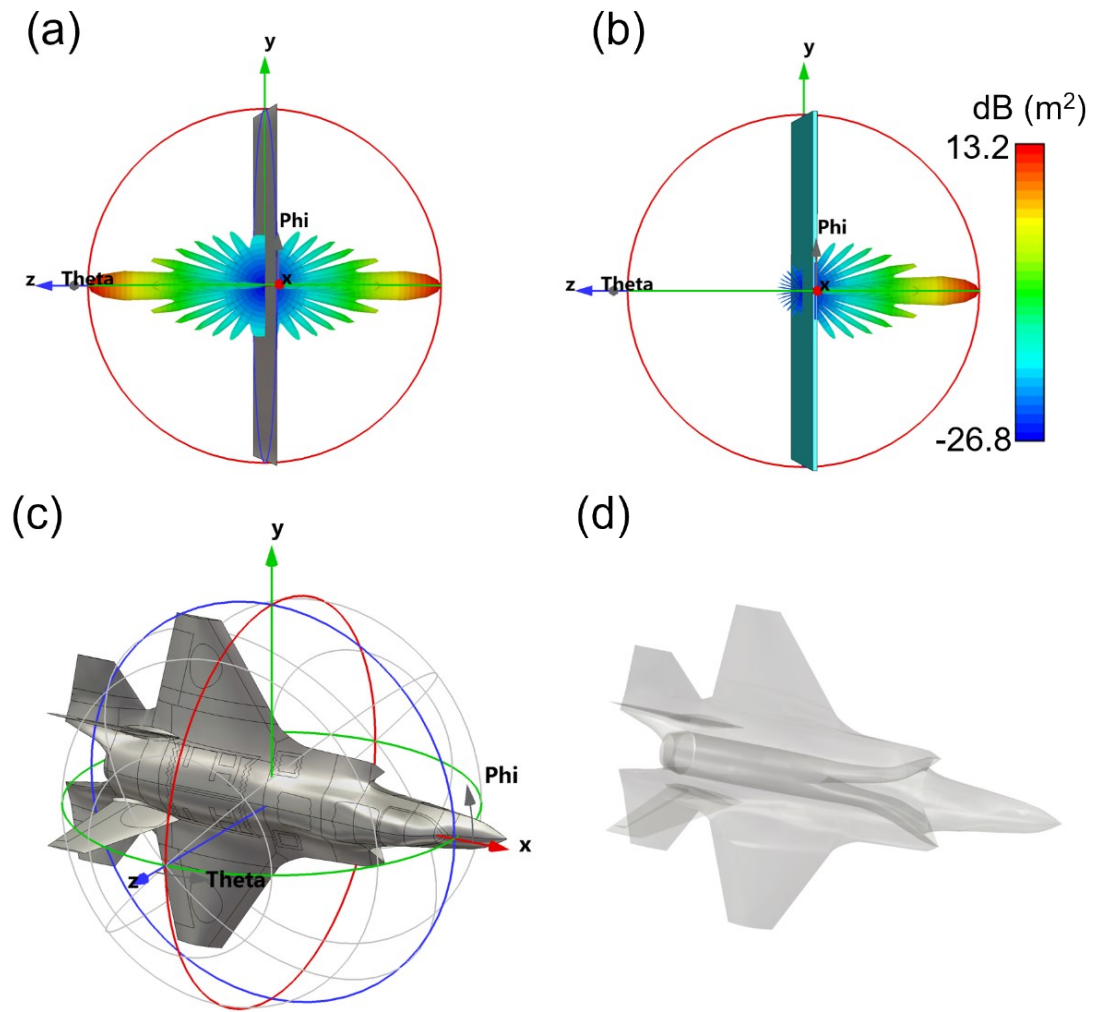

**Fig. S10** (a, b) 3D diagrams of radar cross-section (RCS) simulations for a perfect electric conductor (PEC) with a thickness of 0.1 mm and Fe/Ni@LM with a thickness of 1.96 mm at 12.22 GHz. (c) Simulation of the F-35 aircraft in CST Studio Suite 2022. (d) Location of stealth coating on the fighter aircraft.

**Table S1.** Comparison of  $RL_{min}$  and EAB among reported absorbers for electromagnetic wave absorption

| Absorbers                                             | EAB (GHz) | Thickness (mm) | Reference |
|-------------------------------------------------------|-----------|----------------|-----------|
| TiO <sub>2</sub> @Fe <sub>3</sub> O <sub>4</sub> @PPy | 6.00      | 3.20           | [1]       |
| NiFe <sub>2</sub> O <sub>4</sub> @PPy                 | 6.80      | 2.62           | [2]       |
| PPy/Fe <sub>3</sub> O <sub>4</sub>                    | 6.16      | 3.70           | [3]       |
| CIP@void@NC                                           | 6.90      | 1.70           | [4]       |
| CIP@SiO <sub>2</sub> @Mn                              | 7.12      | 2.00           | [5]       |
| Fe/RGO                                                | 7.52      | 2.62           | [6]       |
| Cu/CuO/C                                              | 6.28      | 2.40           | [7]       |
| 2D-MOFs(Co/Ni/X)                                      | 7.60      | 2.60           | [8]       |
| Co/Ni/C                                               | 7.30      | 2.00           | [9]       |
| OMC/Si@Ni                                             | 8.00      | 2.50           | [10]      |
| 2D-CoNi                                               | 6.24      | 2.60           | [11]      |
| CoFe <sub>2</sub> O <sub>4</sub> @rGO                 | 5.90      | 2.20           | [12]      |
| MnFe <sub>2</sub> O <sub>4</sub> /RGO                 | 4.80      | 3.50           | [13]      |
| Fe/Ni@LM                                              | 9.05      | 2.43           | This work |

## Supporting references

- 1 J. Ding, L. Wang, Y. Zhao, L. Xing, X. Yu, G. Chen, J. Zhang and R. Che, *Small*, 2019, **15**, 1902885.
- 2 L. Rao, Z. Li, Y. Qian, M. Huang, L. Wang, Y. Liu, J. Zhang, Y. Lai, C. Liang and R. Che, *Chem. Eng. J.*, 2024, **488**, 150955.
- 3 X. Yang, B. Fan, X. Tang, J. Wang, G. Tong, D. Chen and J. Guan, *Chem. Eng. J.* 2022, **430**, 132747
- 4 W. Dai, F. Chen, H. Luo, Y. Xiong, X. Wang, Y. Cheng and R. Gong, *J. Alloys Compd.*, 2020, **812**, 152083
- 5 Q. Chen, L. Li, Z. Wang, Y. Ge, C. Zhou and J. Yi, *J. Alloys Compd.*, 2019, **779**, 720-727.
- 6 K. Zhang, Y. Liu, Y. Liu, Y. Yan, G. Ma, B. Zhong, R. Che and X. Huang, *Nano-Micro. Letters.*, 2024, **16**, 151083
- 7 N. He, M. Liu, J. Qi, J. Tong, W. Sao, X. Yang, L. Shi and G. Tong, *Chem. Eng. J.*, 2019, **378**, 122160.
- 8 G. Liu, J. Tu, C. Wu, Y. Fu, C. Chu, Z. Zhu, X. Wang and M. Yan, *ACS Appl. Mater. Interfaces.*, 2021, **13**, 20459-20466.
- 9 G. Sun, H. Wu, Q. Liao and Y. Zhang, *Nano. Res.*, 2018, **11**, 2689-2704.
- 10 P. Zhou, X. Wang, Z. Song, M. Wang, W. Huang, M. Yu, L. Wang and Q. Zhan, *Carbon*, 2021, **176**, 209-218.
- 11 W. Huang, M. Song, S. Wang, B. Wang, J. Ma, T. Liu, Y. Zhang, Y. Kang and R. Che, *Adv. Materi.*, 2024, **36**, 2403397.
- 12 X. Liang, B. Quan, B. Sun, Z. Man, X. Xu and G. Ji, *ACS Sustain. Chem. & Eng.*, 2019, **7**, 10477-10483.
- 13 Y. Wang, X. Wu, W. Zhang and S. Huang, *Materials Technology*, 2017, **32**, 32-37.
